# Supplementary material for: Deciphering of cerebrovasculatures via ICG-assisted NIR-II fluorescence microscopy
Source: Royal Society of Chemistry journal article supplement (doi:10.1039/c9tb01381d), 2019-01-01
Supplement: c9tb01381d1.pdf [file c9tb01381d1.pdf]

## Electronic Supplementary Information

### Deciphering of cerebrovasculatures via ICG-assisted NIR-II fluorescence microscopy

Xiaoming Yu<sup>#</sup>, Zhe Feng<sup>#</sup>, Zhaochong Cai, Minxiao Jiang, Dingwei Xue, Liang Zhu, Yi Zhang, Juan Liu, Bujun Que, Wei Yang, Wang Xi, Dan Zhang\*, Jun Qian\*, Gonghui Li\*

1. Department of Urology, Sir Run-Run Shaw Hospital, Zhejiang University School of Medicine, Hangzhou 310016, China
2. State Key Laboratory of Modern Optical Instrumentations, Centre for Optical and Electromagnetic Research, College of Optical Science and Engineering, Zhejiang University, Zhejiang University, Hangzhou, 310058, China
3. Key Laboratory of Reproductive Genetics, Ministry of Education (Zhejiang University), Department of Reproductive Endocrinology, Women's Hospital, Zhejiang University School of Medicine, Hangzhou 310006, China
4. Interdisciplinary Institute of Neuroscience and Technology (ZIINT), Zhejiang University, Hangzhou, 310058, China
5. School of Basic Medical Sciences, Zhejiang University, Hangzhou, 310058, China

<sup>#</sup>These authors contributed equally.

\*Corresponding author: Prof. Gonghui Li (3193119@zju.edu.cn), Prof. Jun Qian (qianjun@zju.edu.cn), Prof. Dan Zhang (zhangdan@zju.edu.cn)

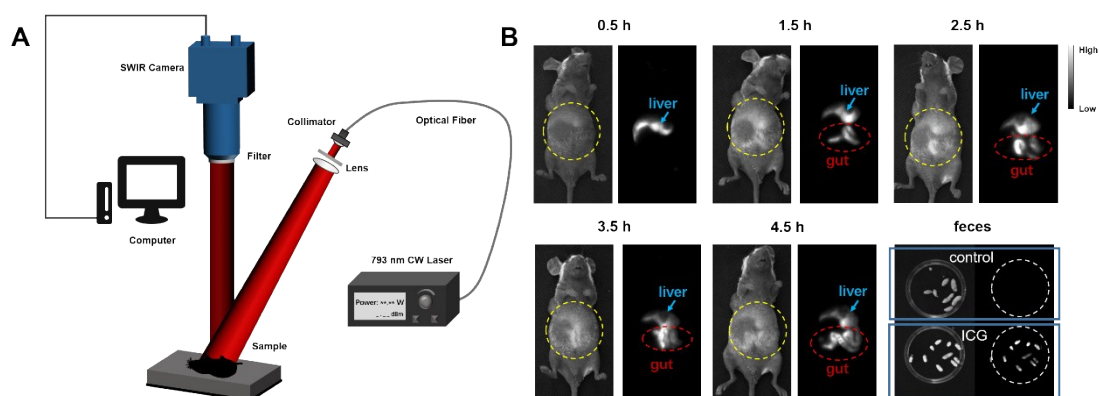

**Fig. S1** (A) Schematic illustration of the setup for NIR-II fluorescence whole-body imaging system. (B) *In vivo* real-time NIR-II fluorescence imaging of the whole

---

intestinal tract in the mouse at various time points after IV injection of ICG (1 mg/mL, 100  $\mu$ L). The feces were collected 5-8 hours post injection. The yellow-dashed circles represent the abdomen regions. Excitation: 793 nm laser (15 mW/cm<sup>2</sup>). Optical filter: 1100 nm long-pass. Exposure time: 100 ms.

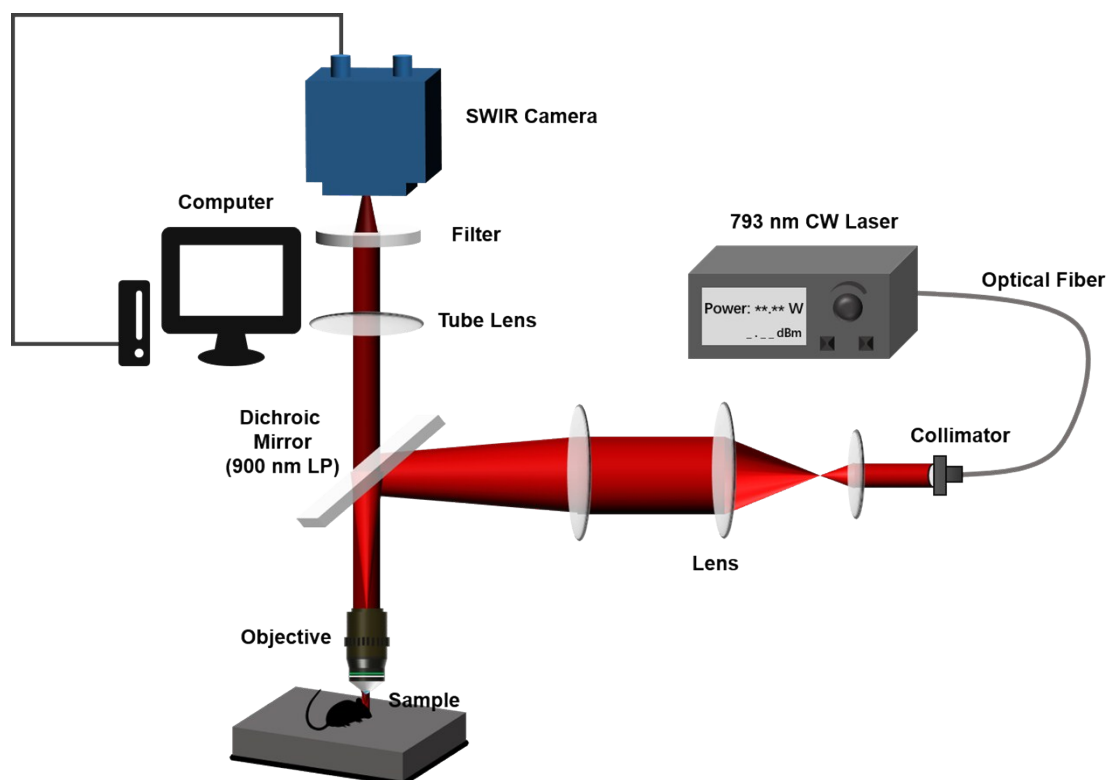

**Fig. S2** Schematic illustration of the setup for NIR-II fluorescence wide-field microscopic imaging system.

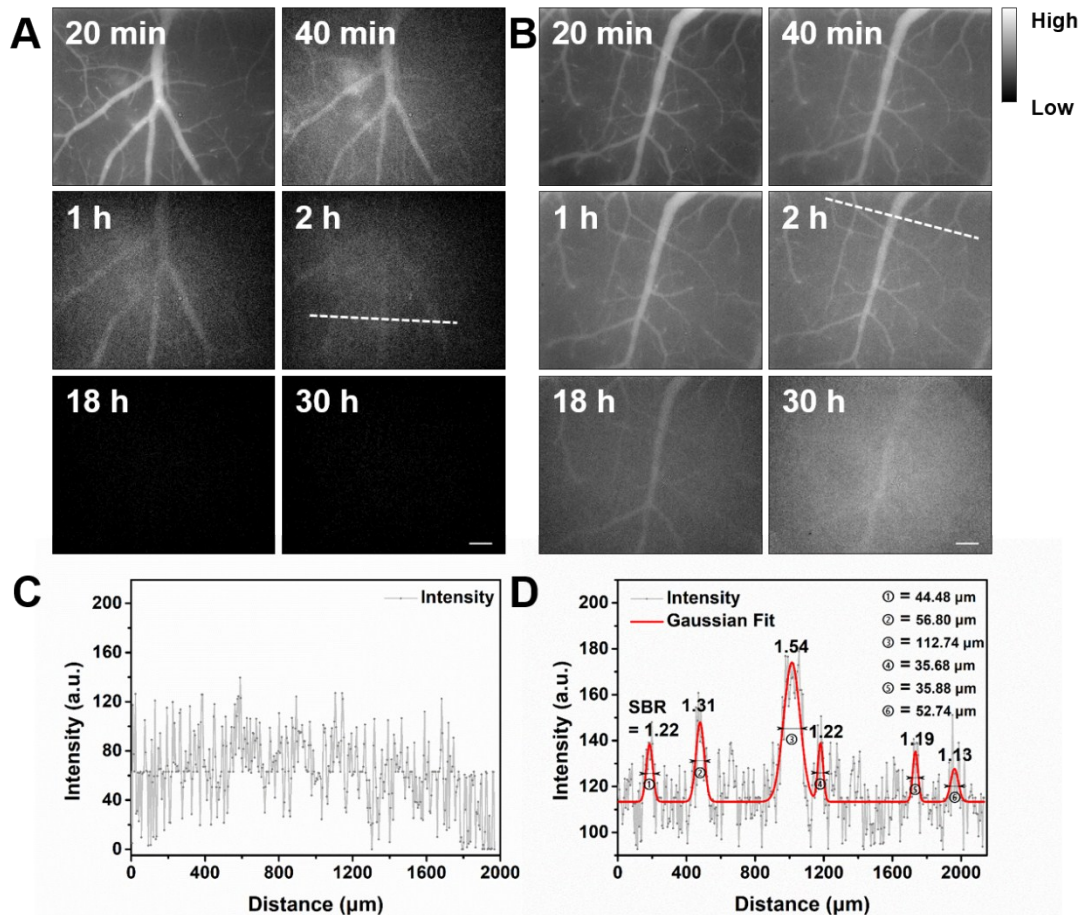

**Fig. S3** NIR-II fluorescence images of cerebrovasculature in the mice at various time points post (A) intravenous injection and (B) intramuscular injection of ICG (1 mg/mL, 100  $\mu\text{L}$ ), under 793 nm laser irradiation. A cross-sectional fluorescence intensity profile (gray) and a Gaussian fitting curve (red) along the white-dashed lines in the recorded images at 2 h post (C) IV injection and (D) IM injection. Objective: scan lens (LSM03, Thorlabs). Optical filter: 1100 nm long-pass. Exposure time: 100 ms. Scale bar indicates 300  $\mu\text{m}$ .

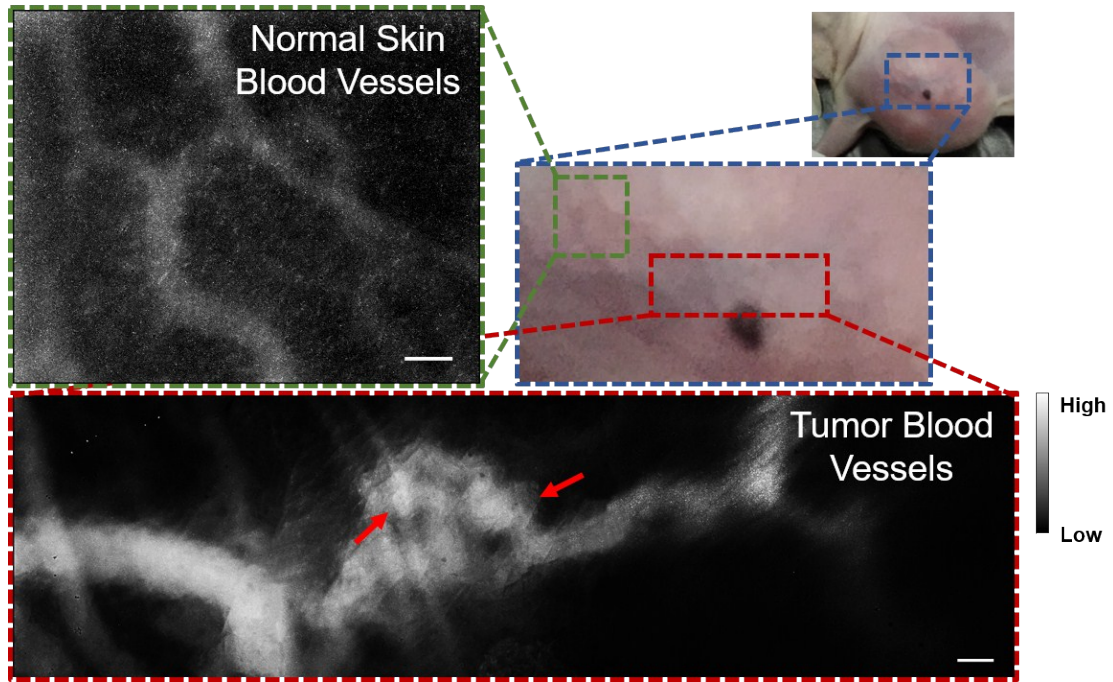

**Fig. S4** *In vivo* NIR-II fluorescence microscopic imaging of the blood vessels in the subcutaneous bladder tumor of mouse, which was intramuscularly injected with ICG (1 mg/mL, 100  $\mu$ L). Excitation: 793 nm laser. Objective: scan lens (LSM03, Thorlabs). Optical filter: 1100 nm long-pass. Exposure time: 300 ms. Scale bar indicates 300  $\mu$ m.

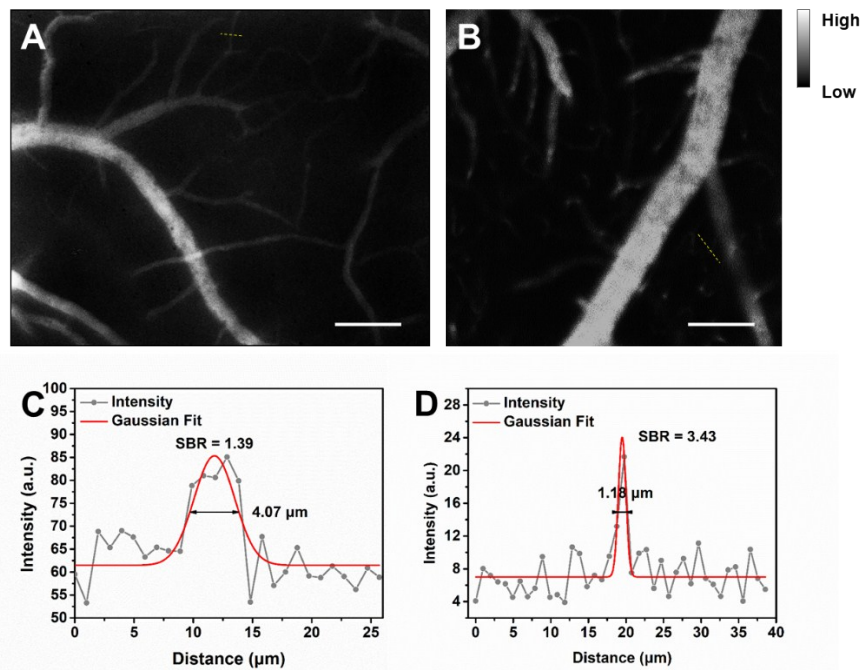

---

**Fig. S5** *In vivo* imaging of brain vasculature in a mouse **(A)** at the depth of 150  $\mu\text{m}$  via NIR-II fluorescence wide-field microscopy and **(B)** at the depth of 160  $\mu\text{m}$  via NIR-II fluorescence confocal microscopy after intramuscular injection of ICG (1 mg/mL, 100  $\mu\text{L}$ ). Scale bar indicates 100  $\mu\text{m}$ . A cross-sectional fluorescence intensity profile (gray) and a Gaussian fitting curve (red) along the yellow-dashed lines in the NIR-II fluorescence **(C)** wide-field micro-images and **(D)** confocal micro-images.

|             | ICG in serum |
|-------------|--------------|
| QY >900 nm  | 4.2 %        |
| QY >1000 nm | 0.83 %       |
| QY >1100 nm | 0.18 %       |
| QY >1200 nm | 0.05 %       |

**Tab. S1.** Fluorescence QYs of ICG in serum beyond 900 nm, 1000 nm, 1100 nm and 1200 nm.

**Video S1.** Cerebral vessels at different depths below skull in a mouse. Objective: 25 $\times$ . Exposure time: 100 ms.
